# Supplementary material for: Lipid-Binding Aegerolysin from Biocontrol Fungus Beauveria bassiana
Source: MDPI journal article supplement (doi:10.3390/toxins13110820), 2021-11-20
Supplement: s1 [file s1]

# Supplementary Materials: Lipid-Binding Aegerolysin from Biocontrol Fungus *Beauveria bassiana*

Nada Kraševc, Anastasija Panevska, Špela Lemež, Jaka Razinger, Kristina Sepčič, Gregor Anderluh and Marjetka Podobnik

Sequence 1: PleosPC9\_1|72745|PlyA(PriA)  
 Sequence 2: sp|P83467|OstreolysinA6  
 Sequence 3: pdb|6MYJ|OstreolysinA6+SM  
 Sequence 4: pdb|4OEB|PleurotolysinA

Sequences 1:2=99 %  
 Sequences 1:3=97 %  
 Sequences 1:4=95 %

Sequences 2:3=98 %  
 Sequences 2:4=94 %  
 Sequences 3:4=93 %

```

sp|P83467|OstreolysinA6      -MAYAQWVIIIIHNVGSQDVKIKNLKASWGKLHADGDKDAEVSASNYEGKIVKPDEKLQINACGRSDAAE
pdb|6MYJ|OstreolysinA6+SM   G MAYAQWVIIIIHNVGSQDVKIKNLKASWGKLHADGDKDAEVSASNYEGKIVKPDEKLQINASGRSDAAE
PleosPC9_1|72745|PlyA(PriA) -MAYAQWVIIIIHNVGSQDVKIKNLKASWGKLHADGDKDAEVSASNYEGKIVKPDEKLQINACGRSDAAE
pdb|4OEB|PleurotolysinA     -MAYAQWVIIIIHNVGSQDVKIKNLKPSWGKLHADGDKDAEVSASNYEGTVIKPDEKLQINACGRSDAAE
                               *****:*****:*****:*****:***:.;*****:*****
                               *****:*****:*****:*****:***:.;*****:*****

sp|P83467|OstreolysinA6      GTTGTFDLVDPADGDKQVRHFYWDSPWGSKTNTWTVSGSNTKWMIEYSGQNLD SGALGTITVDTLKKGN
pdb|6MYJ|OstreolysinA6+SM   GTTGTFDLVDPADGDKQVRHFYWDSPWGSKTNTWTVSGSNTKWMIEYSGQNLD SGALGTITVDTLKKGN
PleosPC9_1|72745|PlyA(PriA) GTTGTFDLVDPADGDKQVRHFYWDSPWGSKTNTWTVSGSNTKWMIEYSGQNLD SGALGTITVDTLKKGN
pdb|4OEB|PleurotolysinA     GTTGTFDLVDPADGDKQVRHFYWDSPWGSKTNTWTVSGSNTKWMIEYSGQNLD SGALGTITVDTLKKGN
                               *****:*****:*****:*****:***:.;*****:*****
  
```

**Figure S1.** Alignment of aegerolysin protein sequences from different *Pleurotus ostreatus* strains. Alignment by ClustalW [92].

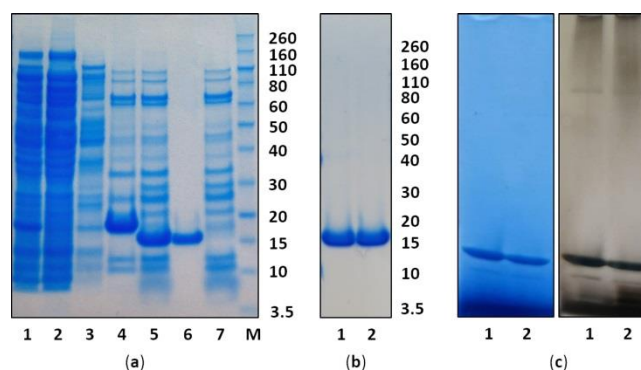

**Figure S2.** Recombinant beauveriolysin A (BlyA) at SDS and blue native PAGE electrophoresis. (a) Recombinant production of BlyA; different phases of BlyA protein purification followed by Simply blue stained SDS-PAGE gel: 1, bacterial lysate (LB 24 h 20°C); first Ni-NTA chromatography: 2, unbound proteins; 3, non-specifically bound proteins; 4, eluate; 5, eluate after dialysis and TEVcleavage; second Ni-NTA chromatography: 6, purified BlyA protein / unbound proteins after TEV-cleavage; 7, eluate; M, Novex Sharp Unstained Protein Standard. (b) Simply blue stained SDS PAGE gel and (c) Coomassie Brilliant Blue stained and silver stained blue native electrophoresis gel; 1, without the reductant; 2, reduced with DTT.

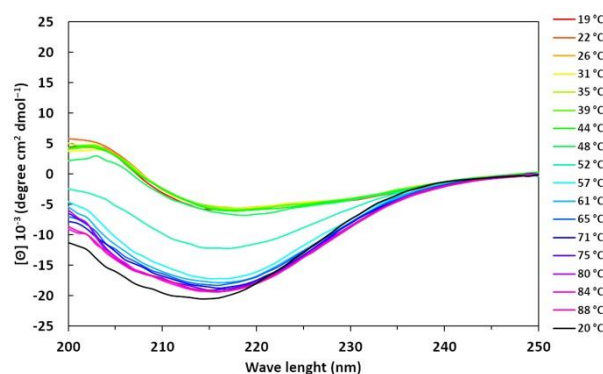

**Figure S3.** Circular dichroism spectra of beauveriolysin A (BlyA) at different temperatures.

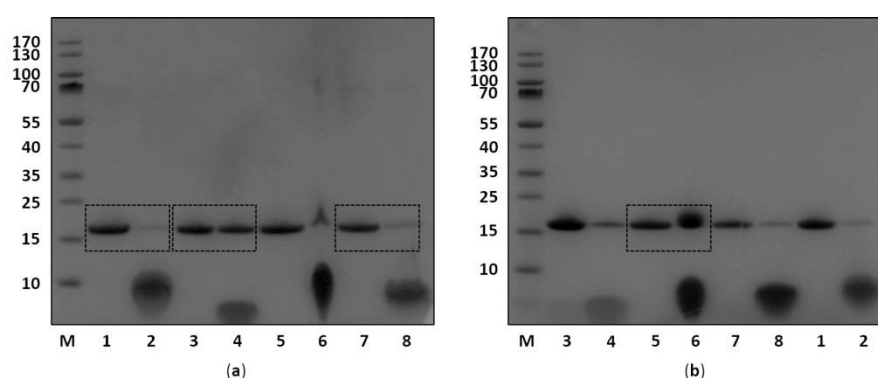

**Figure S4.** Sedimentation of multilamellar vesicles containing different binary lipid mixtures by beauveriolysin A (BlyA). (a) and (b) Two replicates of the sedimentation assay; M, Thermo Scientific PageRuler prestained protein ladder; 1 and 2, POPC: Chol S and P; 3 and 4, CPE: Chol S and P; 5 and 6, SM: Chol S and P; 7 and 8, CPE: POPC S and P; all lipid mixtures in a 1: 1 molar ratio; MLV, multilamellar vesicles; SM, sphingomyelin; Chol, Cholesterol; CPE, ceramide phosphoethanolamine; POPC, palmitoyl-oleoyl-phosphatidylcholine; S, supernatant; P, pellet.

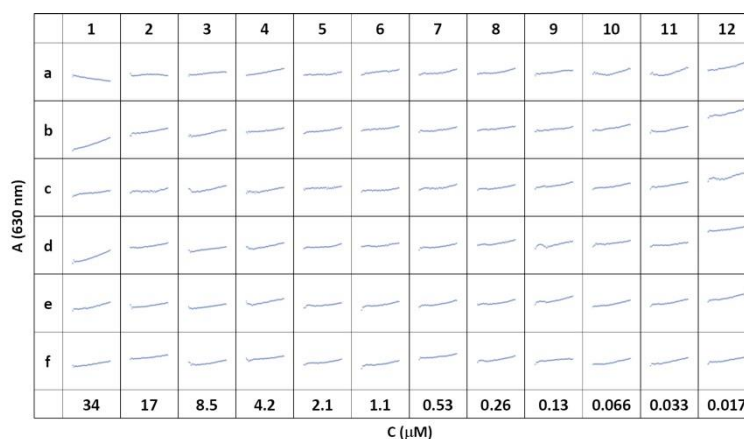

**Figure S5.** Hemolysis of bovine erythrocytes by beauveriolysin A (BlyA). Measurements of absorbance at 630 nm were performed in triplicate for 20 min, with reading every 20 s. a-c, BlyA stored in phosphate buffer (50mM NaH<sub>2</sub>PO<sub>4</sub> × 2H<sub>2</sub>O pH 7.5, 300mM NaCl); and d-f, in erythrocyte buffer (20 mM Trizma base, 140 mM NaCl, pH 7.4).

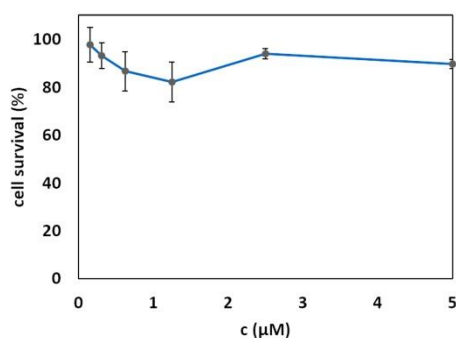

**Figure S6.** Viability assay of insect cells in the presence of beauveriolysin A (BlyA). *Spodoptera frugiperda* Sf9 cells were plated in 96-well plates at  $3.7 \times 10^4$  cells/cm<sup>2</sup> at 28 °C in protein-free insect cell medium Insect XPRESS with L-glutamine (Lonza, USA). After 48 hours, cells were treated with BlyA (0.156–5 μM) for 30 minutes. Data from viability assays are expressed as the percentages of luminescence from treated to untreated cells, as mean ± standard error of two independent experiments, each performed in triplicate.

**Table S1.** Description of protein domains position.

| Protein   | Comment        | Protein size | Domain         | Domain number | Domain position |
|-----------|----------------|--------------|----------------|---------------|-----------------|
| BlyB      | BlyA partner   | 497          |                |               |                 |
| GNIP1Aa   | Model template | 536          | MACPF          | PF01823       | 62-303          |
|           |                |              | Vps62          | PF06101       | 326-535         |
| MPEG-1    | Model template | 642          | MACPF          | PF01823       | 108-324         |
|           |                |              | P2             | [58,63]       | 354-561         |
| C9        | Model template | 529          | TSP_1          | PF00090       | 25-73           |
|           |                |              | Ldl_recept_a   | PF00057       | 78-113          |
|           |                |              | MACPF          | PF01823       | 251-485         |
| Plu-MACPF | Model template | 511          | MACPF          | PF01823       | 130-345         |
|           |                |              | MABP           | IPR023341     | 359-510         |
| C8a       | Model template | 367          | MACPF          | PF01823       | 142-365         |
| PlyB      | Binary partner | 523          | MACPF          | PF01823       | 91-297          |
|           |                |              | PlyB_C         | PF18684       | 298-470         |
| IP-1B     | Binary partner | 703          | MACPF          | PF01823       | 78-266          |
|           |                |              | Insignificant  |               |                 |
| Cry35Ab1  | Binary partner | 383          | Ricin_B_lectin | IPR008872     | 26-147          |
|           |                |              | Toxin_10       | PF05431       | 174-348         |

BlyA and B, beauveriolysin A and B; GNIP1Aa, Gram-negative insecticidal protein; MPEG-1, macrophage-expressed gene 1 protein (perforin-2); C9, complement component C9; Plu-MACPF, *Photobacterium luminescens* MACPF protein; C8a, complement component C8 alpha chain; PlyB, pleurotolysin B; IP1B, insecticidal two-component protein, 77 kDa unit; Cry35Ab1; 43.8 kDa insecticidal crystal protein. Domains were assigned from EMBL-EBI Pfam [40,64] and some additional domains from InterPro [65] or from reference [63]. MACPF, membrane attack complex/perforin (PF01823); Vps62, vacuolar protein sorting-associated protein 62 (PF06101); β-tripod, β-tripod domain [58]; P2, peripheral domain P2[63]; TSP 1, thrombospondin type 1 domain (PF00090); Ldl recept a, low-density

lipoprotein receptor class A domain (PF00057); MABP, MVB12-associated  $\beta$ -prism domain (IPR023341); PlyB\_C, pleurotolysin B C-terminal domain (PF18684); ricin\_B\_lectin, ricin-type  $\beta$ -trefoil lectin domain (PF00652); toxin 10, insecticidal crystal toxin P42 (PF05431). See Figure 5.
